# Supplementary material for: Designing binary electrocatalysts for hydrogen evolution in saline electrolyte using rapid synthesis on carbon paper supports
Source: Royal Society of Chemistry journal article supplement (doi:10.1039/d3qm00978e), 2024-01-01
Supplement: d3qm00978e1.pdf [file d3qm00978e1.pdf]

Supplemental Information For:

Designing Binary Electrocatalysts for Hydrogen Evolution in Saline Electrolyte

Using Rapid Synthesis on Carbon Paper Supports

Connor S. Sullivan, Sangmin Jeong, Melissa E. King, Michael B. Ross\*

Department of Chemistry, University of Massachusetts Lowell, Lowell, MA 01854

Supporting Figures

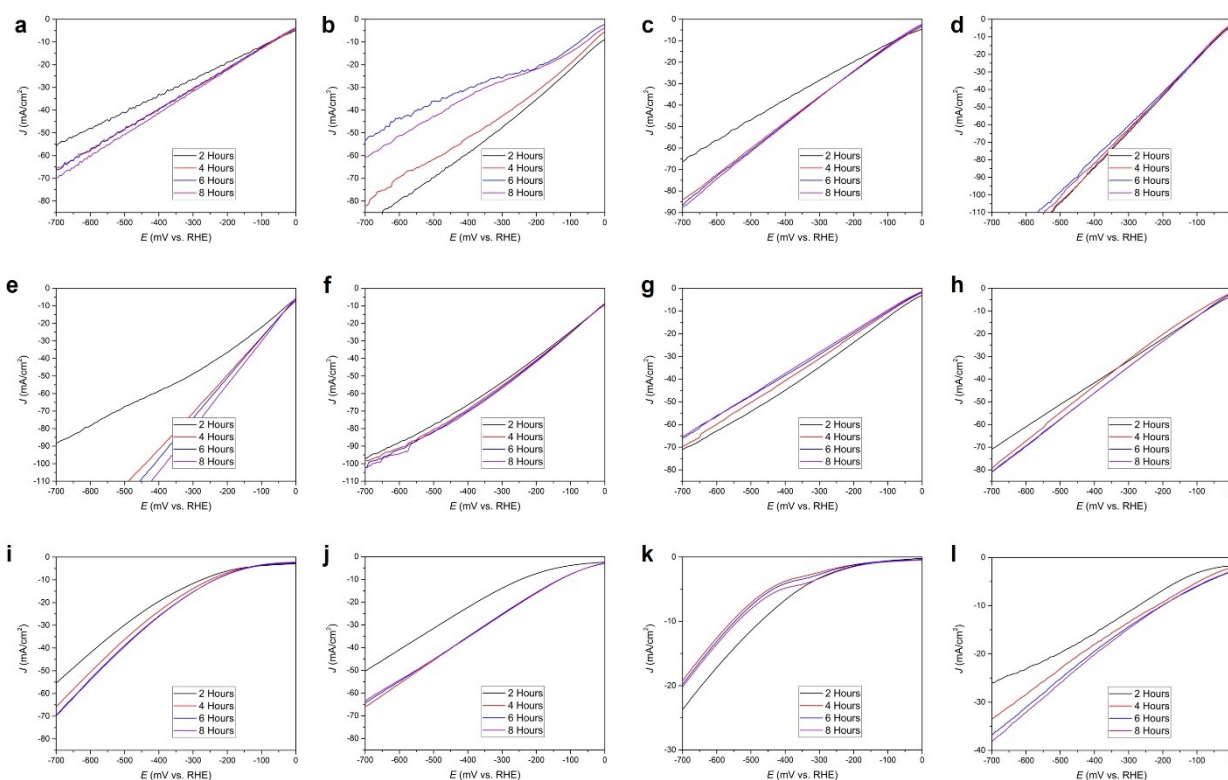

**Figure S1. Eight hour linear sweep voltammetry experiments for the six standout catalysts to look at the stability of each catalyst in both electrolytes. (a.) Pt in control (b.) Pt in saline (c.) Rh in control (d.) Rh in saline (e.) Ni:Pt in control (f.) Ni:Pt in saline (g.) Ni:Rh in control (h.) Ni:Rh in saline (i.) Ni:Au in control (j.) Ni:Au in saline (k.) Fe:Co in control (l.) Fe:Co in saline**

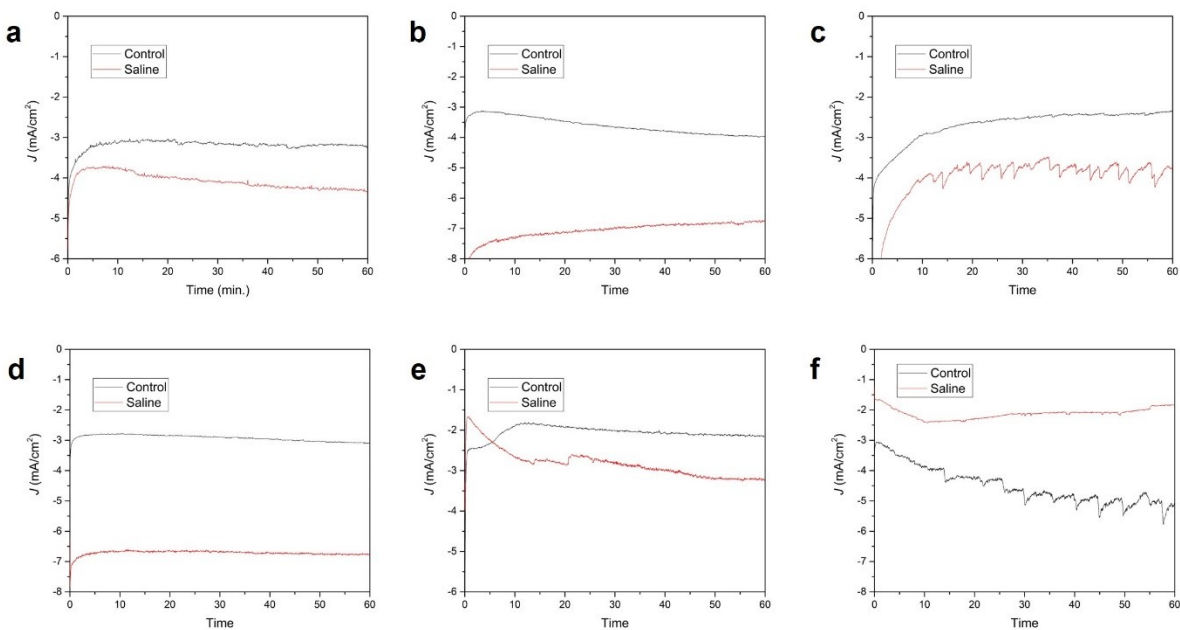

**Figure S2. One-hour chronoamperometry experiments for the six standout catalysts to look at the stability of each catalyst in both conditions. Experiments performed at  $-0.79$  V vs. RHE. (a.) Platinum nanoparticles, (b.) Rhodium nanoparticles, (c.) Ni:Pt nanoparticles, (d.) Ni:Rh nanoparticles, (e.) 1Ni:1Au nanoparticles, and (f.) Fe:Co nanoparticles.**

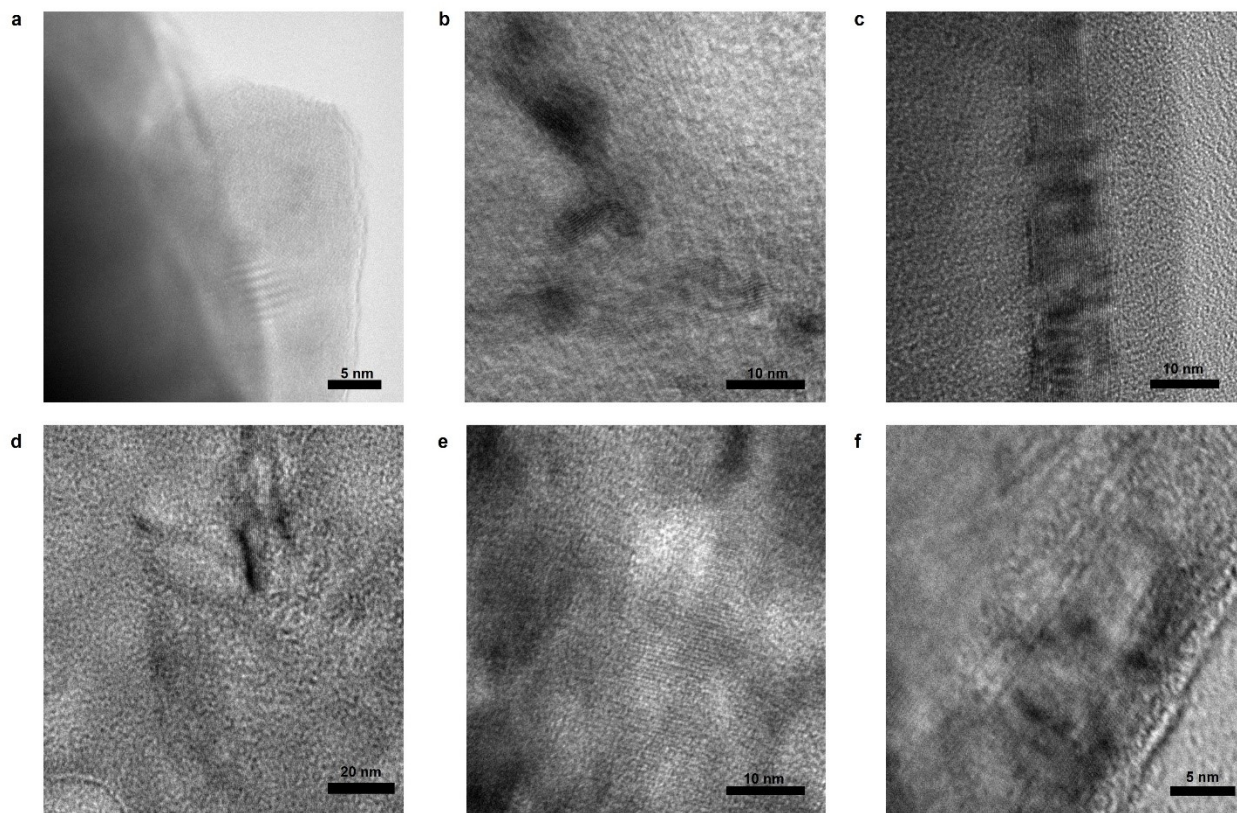

**Figure S3. HR-TEM images of the six standout catalysts. (a.)** Platinum nanoparticles, **(b.)** Rhodium nanoparticles, **(c.)** Ni:Pt nanoparticles, **(d.)** Ni:Rh nanoparticles, **(e.)** Ni:Cu nanoparticles, and **(f.)** Fe:Co nanoparticles.

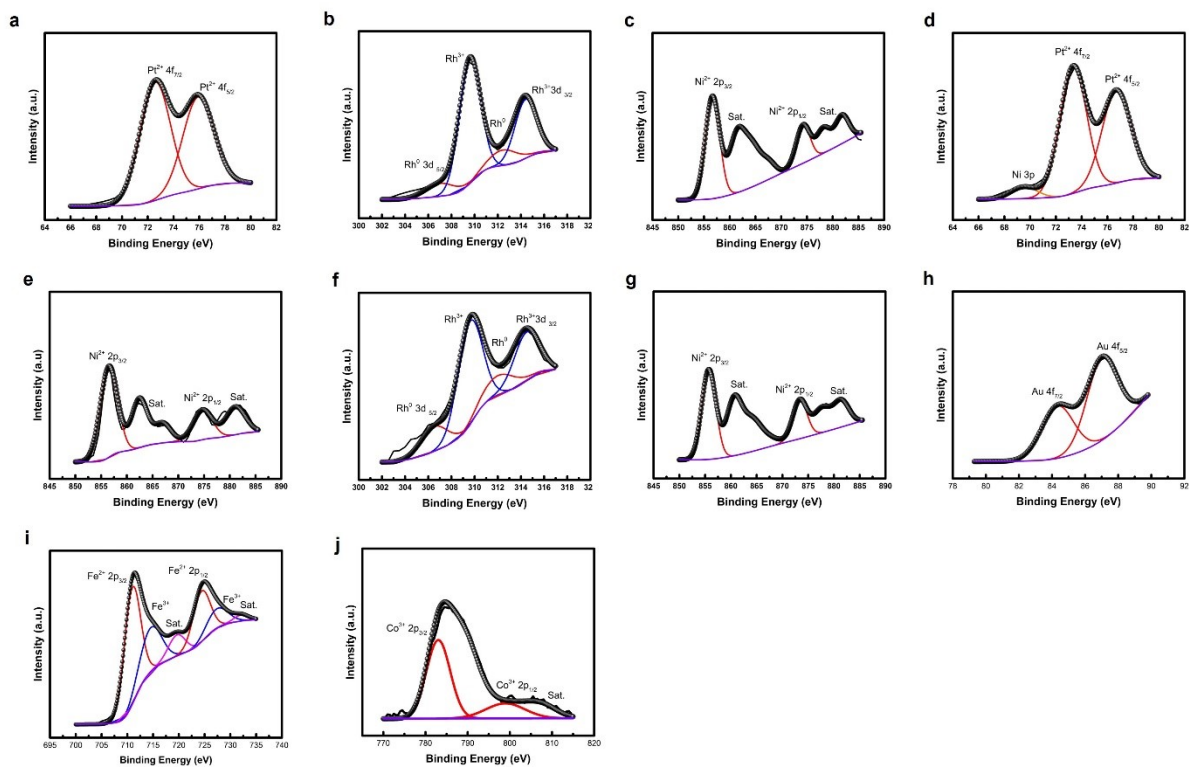

**Figure S4. Elemental XPS analysis of the six standout catalysts. (a.) Platinum (b.) Rhodium (c.) Nickel on Ni:Pt nanoparticles, (d.) Platinum on Ni:Pt nanoparticles, (e.) Nickel on Ni:Rh nanoparticles, (f.) Rhodium on Ni:Rh nanoparticles, (g.) Nickel on Ni:Au nanoparticles, (h.) Gold on Ni:Au nanoparticles, (i.) Iron on Fe:Co nanoparticles, and (j.) Cobalt on Fe:Co nanoparticles.**

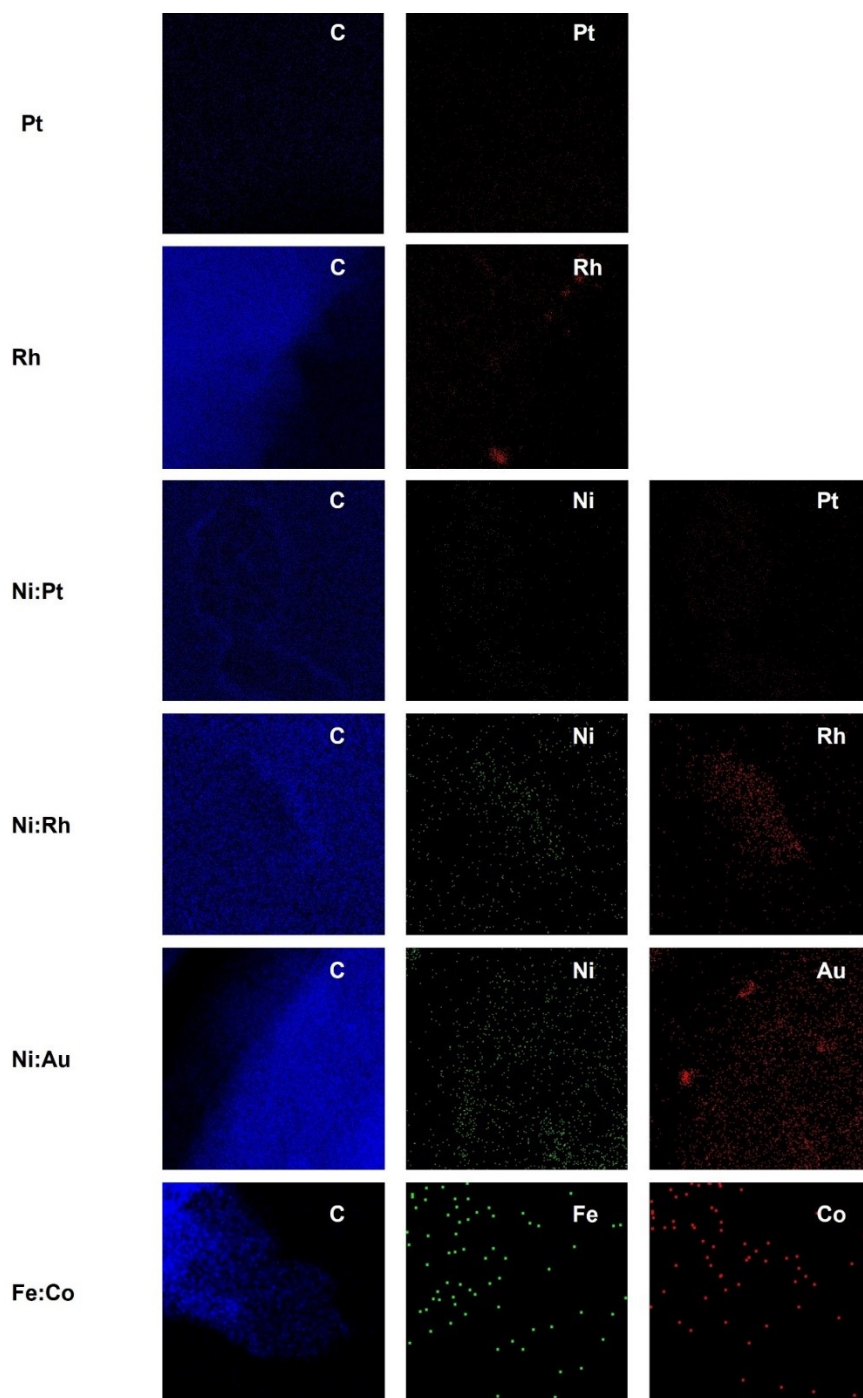

**Figure S5. Elemental mapping of the six standout catalysts. (a.)** Platinum nanoparticles, **(b.)** Rhodium nanoparticles, **(c.)** Ni:Pt nanoparticles, **(d.)** Ni:Rh nanoparticles, **(e.)** Ni:Au nanoparticles, and **(f.)** Fe:Co nanoparticles.

## Supporting Tables

**Table S1. This table shows the overpotentials of all the unary metal catalysts.**

| <b>Unary Metal Catalysts</b> | <b>Control (mV)</b> | <b>Saline (mV)</b> |
|------------------------------|---------------------|--------------------|
| Co                           | 455                 | 450                |
| Cu                           | 430                 | 550                |
| Fe                           | 635                 | 455                |
| Au                           | 290                 | 370                |
| Ni                           | 505                 | 515                |
| Pd                           | 180                 | 150                |
| Pt                           | 35                  | 60                 |
| Rh                           | 55                  | 100                |
| Ag                           | 300                 | 425                |

**Table S2. Table of the overpotentials of all binary metal catalysts.**

| <b>Binary Combination</b> | <b>Control<br/>(mV)</b> | <b>Saline<br/>(mV)</b> |
|---------------------------|-------------------------|------------------------|
| 1Pt:1Rh                   | 40                      | 90                     |
| 1Ni:1Pt                   | 40                      | 50                     |
| 1Pt:1Au                   | 45                      | 70                     |
| 1Pt:1Fe                   | 55                      | 90                     |
| 1Ag:1Pt                   | 60                      | 85                     |
| 1Pt:1Pd                   | 65                      | 90                     |
| 1Pt:1Co                   | 65                      | 80                     |
| 1Pt:1Cu                   | 85                      | 100                    |
| 1Ni:1Rh                   | 110                     | 120                    |
| 1Rh:1Au                   | 110                     | 105                    |
| 1Rh:1Pd                   | 120                     | 135                    |
| 1Rh:1Fe                   | 125                     | 100                    |
| 1Rh:1Co                   | 130                     | 125                    |
| 1Ag:1Rh                   | 135                     | 115                    |
| 1Rh:1Cu                   | 160                     | 150                    |
| 1Fe:1Co                   | 270                     | 294                    |
| 1Ni:1Au                   | 220                     | 275                    |
| 1Fe:1Pd                   | 235                     | 370                    |
| 1Ag:1Ni                   | 235                     | 350                    |
| 1Pd:1Cu                   | 240                     | 295                    |
| 1Co:1Pd                   | 255                     | 280                    |
| 1Fe:1Au                   | 280                     | 465                    |
| 1Ag:1Pd                   | 290                     | 255                    |

|         |     |     |
|---------|-----|-----|
| 1Pd:1Au | 295 | 300 |
| 1Pd:1Ni | 340 | 240 |
| 1Cu:1Co | 345 | 395 |
| 1Cu:1Fe | 355 | 385 |
| 1Co:1Au | 365 | 355 |
| 1Au:1Ag | 375 | 405 |
| 1Au:1Cu | 375 | 425 |
| 1Co:1Ni | 390 | 395 |
| 1Co:1Ag | 415 | 425 |
| 1Ag:1Fe | 445 | 400 |
| 1Cu:1Ag | 480 | 495 |
| 1Cu:1Ni | 580 | 460 |
| 1Ni:1Fe | 610 | 540 |



**Table S3. Table of the change in overpotentials of all binary metal catalysts.**

| <b>Binary Metal Catalysts</b> | <b>Control (mV)</b> | <b>Saline (mV)</b> |
|-------------------------------|---------------------|--------------------|
| 1Pt:1Rh                       | 5                   | 10                 |
| 1Ni:1Pt                       | 5                   | 5                  |
| 1Pt:1Au                       | 0                   | 35                 |
| 1Pt:1Fe                       | 5                   | 20                 |
| 1Ag:1Pt                       | 25                  | 15                 |
| 1Pt:1Pd                       | 0                   | 20                 |
| 1Pt:1Co                       | 5                   | 15                 |
| 1Pt:1Cu                       | 10                  | 65                 |
| 1Ni:1Rh                       | 30                  | 5                  |
| 1Rh:1Au                       | 5                   | 35                 |
| 1Rh:1Pd                       | 0                   | 5                  |
| 1Rh:1Fe                       | 5                   | 40                 |
| 1Rh:1Co                       | 5                   | 5                  |
| 1Ag:1Rh                       | 5                   | 55                 |
| 1Rh:1Cu                       | 40                  | 55                 |
| 1Fe:1Co                       | 40                  | 115                |
| 1Ni:1Au                       | 70                  | 70                 |
| 1Fe:1Pd                       | 20                  | 40                 |
| 1Ag:1Ni                       | 65                  | 25                 |
| 1Pd:1Cu                       | 40                  | 10                 |
| 1Co:1Pd                       | 5                   | 10                 |
| 1Fe:1Au                       | 130                 | 190                |
| 1Ag:1Pd                       | 20                  | 75                 |
| 1Pd:1Au                       | 80                  | 85                 |

|         |     |    |
|---------|-----|----|
| 1Pd:1Ni | 40  | 0  |
| 1Cu:1Co | 75  | 50 |
| 1Cu:1Fe | 65  | 45 |
| 1Co:1Au | 10  | 55 |
| 1Au:1Ag | 120 | 30 |
| 1Au:1Cu | 40  | 50 |
| 1Co:1Ni | 50  | 0  |
| 1Co:1Ag | 0   | 50 |
| 1Ag:1Fe | 55  | 15 |
| 1Cu:1Ag | 0   | 15 |
| 1Cu:1Ni | 5   | 25 |
| 1Ni:1Fe | 15  | 35 |

**Table S4. Quantitative data from XPS analysis of six standout catalysts.**

| <b>Standout<br/>Electrocatalysts</b> | <b>Atomic<br/>Concentration</b> |
|--------------------------------------|---------------------------------|
| Pt                                   | 100.00                          |
| Rh                                   | 100.00                          |
| Ni:Pt                                | 40.09 : 59.91                   |
| Ni:Rh                                | 43.30 : 56.70                   |
| Ni:Au                                | 32.91 : 67.09                   |
| Fe:Co                                | 22.83 : 77.17                   |
